# Supplementary material
Source: publisher site journal article supplement (https://www.dovepress.com/article/345066)
Supplement: Supplementary file 1 [file get_supplementary_file.php]

Appendix 1: Delphi Questionnaire for Validation phase

**Topic 1 - Timely detection of signs of psychosis/EOS and formal diagnosis**

1. Diagnosis of psychosis and early-onset schizophrenia (EOS) often requires repeated evaluations, due to non-specific symptoms and signs and potential patient reluctance to disclose symptoms.
2. The gold standard for diagnosing primary psychosis or EOS should include:

2.1 detailed history-taking of both patient and family.

2.2 assessment of cognitive problems.

2.3 thorough physical assessment, routine laboratory testing.

2.4 ruling out substance-induced psychosis by history.

2.5 confirmation of EOS using validated clinical classification criteria.

2.6 confirmation of EOS using validated interviews/tools.

2.7 performing of lumbar puncture.

2.8 performing of brain imaging (MRI, CT).

2.9 performing of urine toxicology.

2.10 performing of EEG.

2.11 screening for autoimmune encephalitis.

1. Shortening of the duration from first psychotic symptoms to service engagement improves outcomes.
2. A common obstacle to the timely detection of psychosis/early-onset schizophrenia is:

4.1 the individual’s and/or family’s delay in recognizing symptoms and signs of psychosis.

4.2 the individual’s and/or family’s delay in seeking care for psychosis.

4.3 the lack of readily accessible services.

4.4 the lack of affordable services.

4.5 stigma associated with psychiatric illness and/or care.

4.6 the overlap of the symptoms of other psychiatric disorders with psychosis.

4.7 the co-occurrence of substance use with psychosis.

4.8 the healthcare professionals’ delayed recognition of the symptoms and signs of psychosis.

**Topic 2 - Access to care of individuals with symptoms and signs of psychosis or EOS**

1. To improve access to care and timely recognition and treatment of psychosis/EOS the following group should receive education through mental health literacy campaigns:

5.1 adolescents and young adults (school, college).

5.2 school/college personnel.

5.3 general practitioners/family doctors/pediatricians.

5.4 other healthcare professionals.

5.5 public services personnel (e.g., police, first-line rescue workers, social services)

5.6 general population.

**Topic 3 - Treatments and outcomes**

1. As part of standard care, adolescents/young adults with psychosis/EOS should receive both pharmacological and specific, evidence-based psycho-social interventions.
2. Compared to the management of adults with multi-episode psychosis, management of adolescents/young adults with psychosis/EOS differs in that:

7.1 antipsychotics should be initiated in adolescents/young adults only if initial psycho-therapeutic interventions are not effective.

7.2 adolescents/young adults are more sensitive to antipsychotic side effects.

7.3 adolescents/young adults require lower antipsychotic doses.

7.4 adolescents/young adults achieve higher rates of remission.

7.5 adolescents/young adults should only be treated with antipsychotics that are licensed in that age group.

7.6 adolescents/young adults should have fasting metabolic parameters checked more frequently (e.g., 6-monthly).

7.7 discontinuation of antipsychotic treatment should be attempted at least once after sufficient time of symptomatic remission and return to premorbid functioning.

1. During maintenance treatment, the antipsychotic dose should be decreased compared to the effective acute dose.
2. Adolescents/young adults pharmacologically treated for psychosis or EOS should be monitored at each visit for clinical side effects.
3. During antipsychotic treatment of adolescents/young adults with psychosis/EOS, the following side-effects/parameters should be assessed routinely at the following time points:

10.1 body weight at least monthly.

10.2 blood pressure at least every 3 months.

10.3 fasting glucose and lipid parameters at least six-monthly.

10.4 prolactin levels at baseline and target dose during treatment with prolactin-raising antipsychotics.

10.5 liver function at least annually.

10.6 menstrual dysregulation and sexual dysfunction at each visit during treatment with prolactin-raising antipsychotics.

10.8 tardive dyskinesia at least every 3 months.

10.9 ECG at the time of starting an antipsychotic.

10.10 ECG at steady dose of antipsychotic treatment.

**Topic 4 - Non-pharmacological interventions**

1. To improve treatment adherence of adolescents/young adults with psychosis/EOS, the following intervention should be used:
   1. building rapport/alliance.
   2. patient psychoeducation.
   3. family psychoeducation.
   4. motivational interviewing.
   5. shared decision making.
   6. pill-boxes.
   7. reminders (mail, e-mail, telephone, SMS).
   8. digital interventions (mobile or desktop app).
   9. long-acting injectable antipsychotics.
2. Functional outcome of adolescents/young adults with psychosis/EOS can adequately be improved by:

12.1 psychoeducation.

12.2 psychodynamic therapy.

12.3 cognitive behavioral therapy.

12.4 social skills training.

12.5 supported employment and education intervention.

12.6 occupational therapy.

12.7 assertive outreach team.

12.6 art / music therapy.

12.7 physical activity.

12.8 targeting negative symptoms.

12.9 targeting cognitive symptoms.

**Topic 5 - Strategic management**

1. Local intervention services for adolescents/young adults with early psychosis/EOS should be connected and coordinated within a specialized network.
2. Adolescents/young adults with first episode psychosis should be followed within specialized early intervention services for at least:

14.1 6 to less than 12 months.

14.2 12 to less than 24 months.

14.3 24 months to less than 36 months.

14.4 36 months to less than 60 months.

14.5 5 years and longer.

1. To improve outcomes in patients with psychosis, adolescents/young adults should receive care in an integrated transitional age psychiatric service covering age 15-25.

**Topic 6 - Clinical Practice/Scientific Evidence**

1. The most important goal of treatment in adolescents/young adults with psychosis is:

16.1 symptom remission.

16.2 relapse prevention.

16.3 functional recovery.

16.4 good quality of life.

16.5 integrating physical and mental health.

16.6 targeting patient goals.

1. When choosing a first-line antipsychotic in adolescents/young adults, clinicians should consider potential differences in tolerability more than potential differences in efficacy
2. During antipsychotic treatment of adolescents/young adults with psychosis/EOS the following action should be taken:

18.1 change antipsychotic when there is no antipsychotic response after 2 weeks at therapeutic dose.

18.2 change antipsychotic when there is no antipsychotic response after 4 weeks at therapeutic dose.

18.3 change antipsychotic when there is no antipsychotic response after 6 weeks at therapeutic dose.

18.4 increase the antipsychotic dose above package-insert dose levels, in case of antipsychotic non-response.

18.5 switch to an antipsychotic monotherapy, in case of antipsychotic non-response.

18.6 add a second antipsychotic, in case of antipsychotic non-response.

18.7 cross-taper the antipsychotics, when switching antipsychotics.

18.8 switch to clozapine, in case of nonresponse to 1 antipsychotic.

18.9 switch to clozapine, in case of nonresponse to 2 antipsychotics.

18.10 switch to clozapine, in case of nonresponse to 3 antipsychotics.
